# Supplementary material for: Distribution of guest molecules in Pluronic micelles studied by double electron electron spin resonance and small angle X-ray scattering
Source: Royal Society of Chemistry journal article supplement (doi:10.1039/b812475b), 2008-10-29
Supplement: b812475b.pdf [file b812475b.pdf]

## Supporting information

### Distribution of guest molecules in Pluronic micelles studied by double electron electron resonance and small angle X-ray scattering

Sharon Ruthstein<sup>+</sup>, Arnold M. Raitsimring<sup>&</sup>, Ronit Bitton<sup>^</sup>, Adelheid Godt<sup>\$</sup>,  
Daniella Goldfarb<sup>+</sup>

<sup>+</sup>Department of Chemical Physics, Weizmann Institute of Science, Rehovot, 76100, Israel, <sup>&</sup>Department of Chemistry, University of Arizona, Tucson, AZ 85721, USA, <sup>^</sup>Department of Chemical Engineering, Ben-Gurion University of the Negev, 84105 Beer Sheva, Israel. <sup>\$</sup>Bielefeld University, Faculty of Chemistry, Organic Chemistry Universitätsstr. 25, D-33615 Bielefeld, Germany

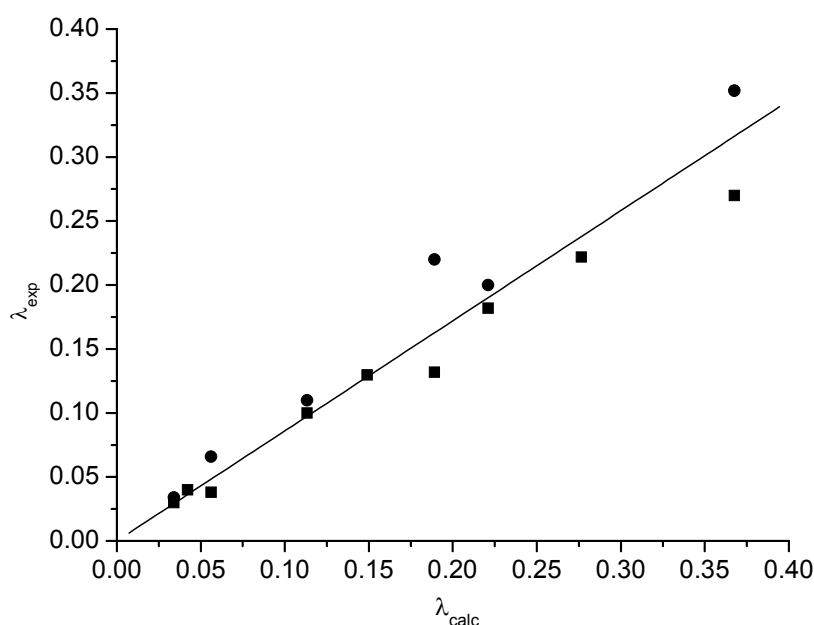

**Figure S1.** Experimental calibration of  $\lambda$  obtained from measurements on solutions of TEMPO radicals in methanol/toluene (1:1) with two concentrations, 2 mM (circles) and 5 mM (squares). The 2 mM sample was measured with two pump pulses of durations 20 and 40 ns and the 5 mM sample with three pump pulse durations of 20, 30, and 40 ns. Other experimental parameters:  $T = 25\text{K}$ ;  $\nu_0 = 32.437\text{GHz}$  and  $B_0 = 1.158\text{ T}$ .  $\lambda_{\text{exp}}$  was determined from Eqs 7,8.

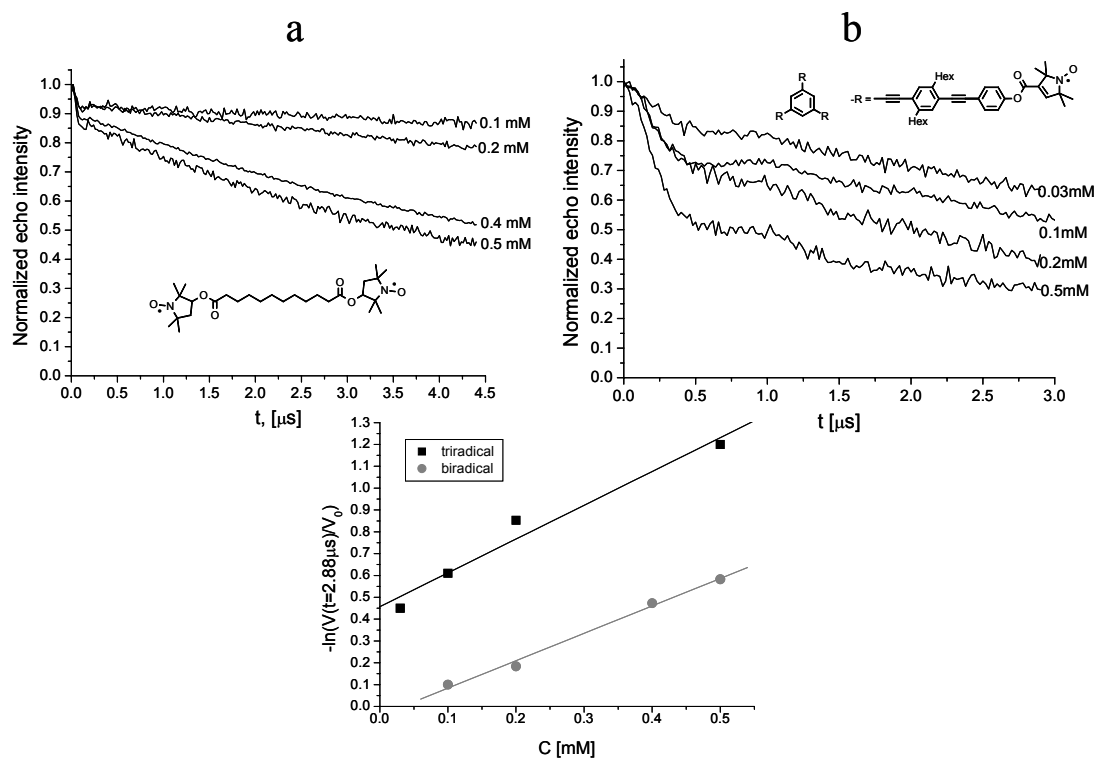

Figure S2. DEER decays at various concentrations of spin-probe for (a) a biradical and (b) a triradical. (c) Plot of  $\ln(V(t=2.88\mu\text{s})/V_0)$  vs the molecular concentration of the biradical and triradical. According to Eq. 24, the slope is equal to  $\lambda n t / \chi$ , where  $t=2.88\mu\text{s}$  and  $n$  is the number of spins per spin-probe molecule. For  $\lambda=0.2$ ,  $\chi=0.96$  and  $1.06$  are obtained for the biradical and triradical, respectively. The intercept for the triradical give  $\ln V_{\text{intra}}(t) = -2\ln(1-\lambda)=0.44$  as expected. This is not the case for the biradical where the effective  $\lambda$  for the pair is lower because of the shorter distances, some of which are outside the range of the DEER method.
